# Supplementary material
Source: PubMed Central journal article supplement (PMC3594034)
Supplement: mt2012237x3.pdf [file mt2012237x3.pdf]

Figure S3

A

| sncRNA                                       | cloning frequency<br>(in RSV infection) |
|----------------------------------------------|-----------------------------------------|
| tRF5-GluCTC                                  | 109332                                  |
| tRF5-GlyGCC                                  | 205832                                  |
| tRF5-LysCTT                                  | 28282                                   |
| miR-21 (the most abundantly<br>cloned miRNA) | 59753                                   |

B

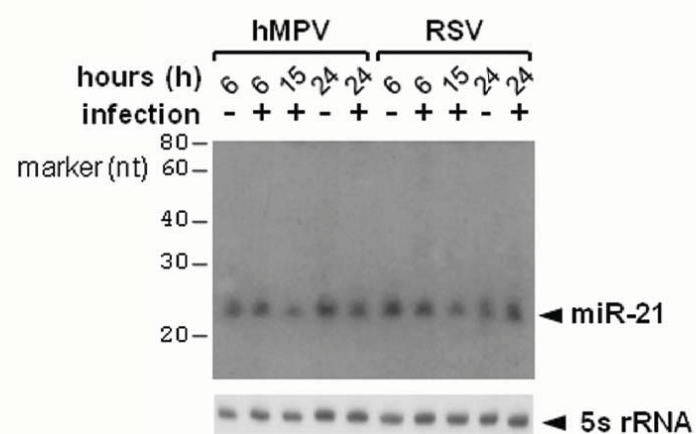

miR-21
