# Supplementary material
Source: PubMed Central journal article supplement (PMC3594034)

A

**tRNA-Gly-GCC** 5'-GCATGGGTGGTTCAGTGGTAGAATTCTCGCTGCCACGCGGGAGGCCCGGGTTCGATTCCC GGCCCATGCA(CCA)-3' (74 nt)

**tRF5-GlyGCC**: 5'-GCATGGGTGGTTCAGTGGTAGAATTCTCG-3' (29 nt)

**the other fragment at the 3'-side**: 5'-CCTGCCACGCGGGAGGCCCGGGTTCGATTCCC GGCCCATGCA(CCA)-3' (45 nt)

+  
|||||

**(Northern probe)** 3'-AGCTAAGGGCCGGGTACGT-5'

B

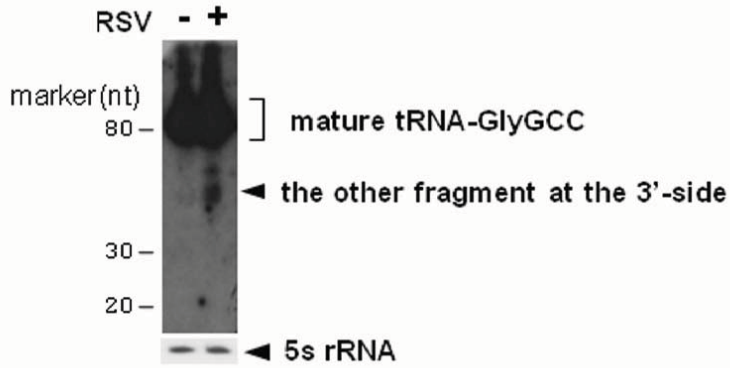

Supplement: mt2012237x5.pdf [file mt2012237x5.pdf]
