# Supplementary material
Source: PubMed Central journal article supplement (PMC3594034)
Supplement: mt2012237x8.pdf [file mt2012237x8.pdf]

Supplementary Table 1. Summary of all tRF-5 series.

| Sequence                         | Origin    | Relative sequencing frequency (% of total sequencing reads ) |         |
|----------------------------------|-----------|--------------------------------------------------------------|---------|
|                                  |           | Mock                                                         | RSV     |
| GGGGGATTAGCTCAAATGGTAGAGCCCTC    | AlaAGC-1  | < 0.0005                                                     | 0.634   |
| GGGGGATTAGCTCAAATGGTAGAGCTCTC    | AlaAGC-2  | 0.002                                                        | 0.450   |
| GGGGGTGTAGCTCAGTGGTAGAGCGCATG    | AlaTGC    | < 0.0005                                                     | 0.241   |
| GGGCCAGTGGCGCAATGGATAACGCCTCT    | ArgACG    | < 0.0005                                                     | 0.090   |
| GACCCAGTGGCCTAATGGATAAGGCATCAG   | ArgCCG    | 0.005                                                        | 0.250   |
| GCCCCAGTGGCCTAATGGATAAGGCACTGCCT | ArgCCT    | 0.002                                                        | 0.110   |
| GACCGCGTGGCCTAATGGATAAGGCTTCTG   | ArgTCG    | 0.001                                                        | 0.080   |
| GGCTCCGTGGCGCAATGGATAGCGCATTG    | ArgTCT-1  | < 0.0005                                                     | 0.540   |
| GGCTCTGTGGCGCAATGGATAGCGCATTG    | ArgTCT-2  | 0.001                                                        | 0.408   |
| GGCTCTCTGGCGCAATGGATAGCGCATTG    | ArgTCT-3  | < 0.0005                                                     | 0.188   |
| GGATCTGTGGCGCAATGGATAGCGCATTG    | ArgTCT-4  | < 0.0005                                                     | 0.116   |
| GGCTCTGTAGCGCAATGGATAGCGCATTGG   | ArgTCT-5  | < 0.0005                                                     | 0.073   |
| GTCTCTGTGGCGCAATCGGTTAGCGCTTTTCG | AsnGTT    | 0.005                                                        | 0.020   |
| TCCTCGTTCGTATAGTGGTGAGTATCCCCG   | AspGTC-1  | 0.006                                                        | 0.940   |
| TCCTCTTTTGTATAGTGGTGAGTATCCCCGC  | AspGTC-2  | 0.001                                                        | 0.163   |
| GGGGGTATAGCTCAGGGGTAGAGCATTTG    | CysGCA    | 0.030                                                        | 36.360  |
| GGTTCCATGGTGTAAATGGTTAGCACTCTGGA | GlnCTG-1* | 0.060                                                        | 11.130  |
| GGTTCCATGGTGTAAATGGTAAGCACTCTG   | GlnCTG-2  | 0.004                                                        | 1.440   |
| GGTTCCATCGTGTAAATGGTGAGCACTCTG   | GlnCTG-3  | 0.003                                                        | 1.120   |
| GGTTCCATCGTGTAAATGGTTAGCACTCTGGA | GlnCTG-4  | 0.006                                                        | 0.185   |
| GGTTCCATGGTGTAAACGGTTAGCACTCTGGA | GlnCTG-5  | < 0.0005                                                     | 0.170   |
| GGTTCCATTGTGTAAATGGTAAGCACTCTGGA | GlnCTG-6  | 0.004                                                        | 0.138   |
| GGTTCCATGTGTAAATGGTTAGCACTCTGG   | GlnCTG-7  | 0.003                                                        | 0.109   |
| GGTCCCGTGGTGTAAATGGTTAGCACTCTGG  | GlnTTG    | 0.030                                                        | 2.540   |
| TCCCTGGTGGTCTAGTGGTTAGGATTCGGCG  | GluCTC-1* | 0.122                                                        | 51.900  |
| TCCCTGTGGTCTAGTGGTTAGGATTCGGCG   | GluCTC-2  | 0.050                                                        | 18.250  |
| TCCCTGGTGGTCTAGTGGCTAGGATTCGGCG  | GluTTC-1  | 0.012                                                        | 6.350   |
| TCCCACATGGTCTAGCGGTTAGGATTCCTG   | GluTTC-2  | 0.021                                                        | 2.910   |
| TCCCATATGGTCTAGCGGTTAGGATTCCTGG  | GluTTC-3  | 0.006                                                        | 2.200   |
| TCCCTGTGGTCTAGTGGCTAGGATTCGGCG   | GluTTC-4  | 0.007                                                        | 0.830   |
| GCATGGGTGGTTCAGTGGTAGAATTCTCG    | GlyGCC-1* | 2.090                                                        | 105.700 |
| GCGCCGCTGGTGTAGTGGTATCATGCAAG    | GlyGCC-2  | 0.350                                                        | 90.600  |
| GCATTGGTGGTTCAGTGGTAGAATTCTCG    | GlyGCC-3  | 0.507                                                        | 30.800  |
| GCATTGGTGGTTCAGTGGGAGAATTCTCG    | GlyGCC-4  | < 0.0005                                                     | 3.970   |
| GCGTTGGTGGTATAGTGGTGAGCATAGCTG   | GlyTCC-1  | 0.015                                                        | 3.356   |
| GCGTTGGTGGTATAGTGGTGAGAATAGCT    | GlyTCC-2  | 0.005                                                        | 1.230   |
| GCCGTGATCGTATAGTGGTTAGTACTCTGCG  | HisGTG-1  | 0.006                                                        | 1.100   |
| GCCGTAATCGTATAGTGGTTAGTACTCTGCG  | HisGTG-2  | < 0.0005                                                     | 0.230   |
| GCTCCAGTGGCGCAATCGGTTAGCGCGCGG   | IleTAT    | < 0.0005                                                     | 0.010   |
| GGCCGGTTAGCTCAGTTGGAAGAGCGTGGTG  | IleGAT    | < 0.0005                                                     | 0.010   |
| GGTAGCGTGGCCGAGCGGTCTAAGGCCCTGG  | LeuAAG-1  | < 0.0005                                                     | 0.392   |

|                                   |           |          |          |
|-----------------------------------|-----------|----------|----------|
| GGTAGCGTGGCCGAGCGGTCTAAGGCTCTGG   | LeuAAG-2  | 0.001    | 0.245    |
| GGTAGCGTGGCCGAGCGGTCTAAGGCGCTGG   | LeuAAG-3  | 0.001    | 0.239    |
| GTCAGGATGGCCGAGTGGTCTAAGGCCAGA    | LeuCAA-1  | 0.006    | 0.695    |
| GTCAGGATGGCCGAGTGGTCTAAGGCGCCAG   | LeuCAA-2  | 0.001    | 0.086    |
| GTCAGGATGGCCGAGCGGTCTAAGGCGCTGC   | LeuCAG    | 0.050    | 0.200    |
| GTTAAGATGGCAGAGCCCGGTAATCGCATAA   | LeuTAA    | 0.100    | 2.530    |
| GGTAGTGTGGCCGAGCGGTCTAAGGCCTGG    | LeuTAG    | 0.003    | 0.550    |
| GCCCCGGCTAGCTCAGTCGGTAGAGCATGAG   | LysCTT-1* | 0.037    | 14.100   |
| GCCCCGGCTAGCTCAGTCGGTAGAGCATGGGA  | LysCTT-2  | 0.008    | 2.200    |
| GCCCCGGCTAGCTCAGTCAGTAGAGCATGGG   | LysCTT-3  | 0.000    | 1.060    |
| GCCCCGATAGCTCAGTCGGTAGAGCATCAG    | LysTTT    | 0.090    | 3.110    |
| AGCAGAGTGGCGCAGCGGAAGCGTGCTG      | MetCAT-1  | 0.003    | 3.780    |
| AGCAGAGGGGCGCAGCGGAAGCGTGCTG      | MetCAT-2  | < 0.0005 | 0.510    |
| AGCAGAGTGGCGCAGTGGGAAGCGTGCTG     | MetCAT-3  | < 0.0005 | 0.470    |
| GCCGAAATAGCTCAGTTGGGAGAGCTTTAGA   | PheGAA    | < 0.0005 | 1.590    |
| GGCTCGTTGGTCTAGGGGTATGATTCTCG     | ProAGG    | < 0.0005 | 0.050    |
| GGCTCGTTAGTCTAGGGGTATGATTCTCGCTTC | ProCGG    | 0.001    | 0.000    |
| GGCTCGTTGGTCTAGTGGTATGATTCTCG     | ProTGG    | 0.007    | 0.460    |
| GTAGTCGTGGCCGAGTGGTTAAGGCTATGG    | SerAGA    | 0.007    | 0.460    |
| GCTGTGATGGCCGAGTGGTTAAGGCTTTGGA   | SerCGA    | 0.001    | 0.160    |
| GACGAGGTGGCCGAGTGGTTAAGGCAATGG    | SerGCT-1  | 0.004    | 1.123    |
| GACGAGGTGGCCGAGTGGTTAAGGCTATGG    | SerGCT-2  | 0.004    | 0.809    |
| GACGAGGTGGCCGAGTGGTTAAGGCGATGG    | SerGCT-3  | 0.001    | 0.246    |
| GCAGCGATGGCCGAGTGGTTAAGGCTTTG     | SerTGA    | 0.002    | 0.030    |
| GGCGCGTGGCTTAGTTGGTTAAAACTCCTG    | ThrAGT    | 0.001    | 0.130    |
| GGCGCGTGGCCAAGTGGTAAGGCTTCGG      | ThrCGT    | 0.002    | 0.060    |
| CCTTCAATAGATCAGCTGGTAGAGC         | TyrATA    | < 0.0005 | < 0.0005 |
| GTTTCCGTAGTGTAGTGGTCATCACGTTT     | ValAAC-1  | 0.010    | 2.810    |
| GGGGGTAGCTCAGTGGTAGAGCGT          | ValAAC-2  | < 0.0005 | 0.517    |
| GTTTCCGTAGTGTAGTGGTTATCACATTC     | ValCAC    | 0.020    | 1.170    |
| GTTTCCGTGGTGTAGTGGTTATCACATTC     | ValTAC    | 0.070    | 0.520    |
