# Supplementary material
Source: PubMed Central journal article supplement (PMC3594034)

Figure S1

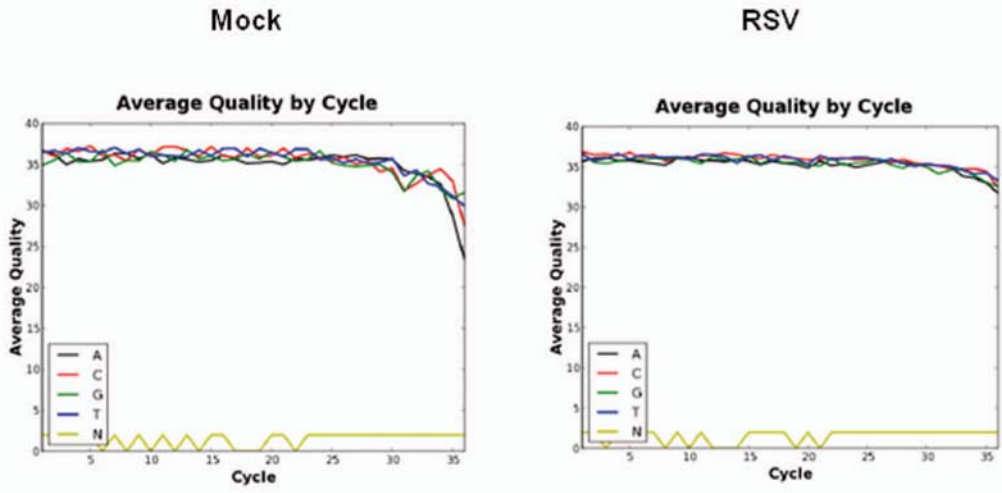

Supplement: mt2012237x1.pdf [file mt2012237x1.pdf]

Figure S2

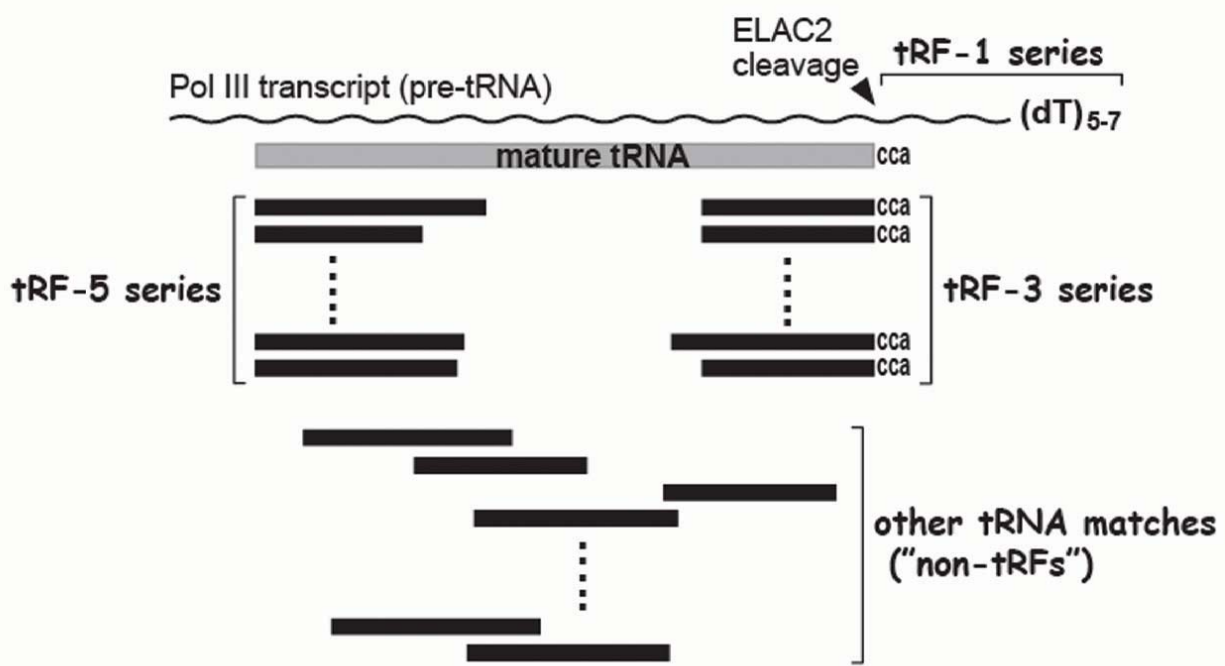

Supplement: mt2012237x2.pdf [file mt2012237x2.pdf]

Figure S4

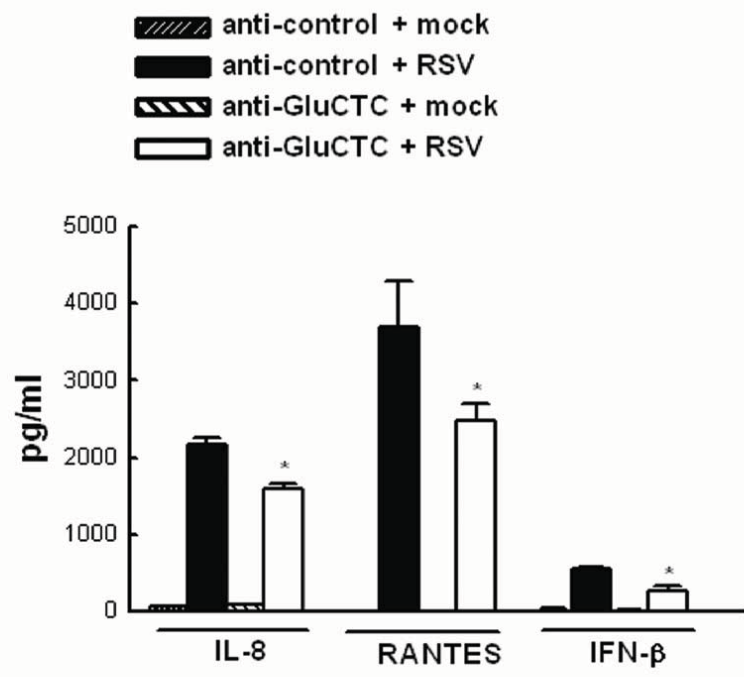

Supplement: mt2012237x4.pdf [file mt2012237x4.pdf]

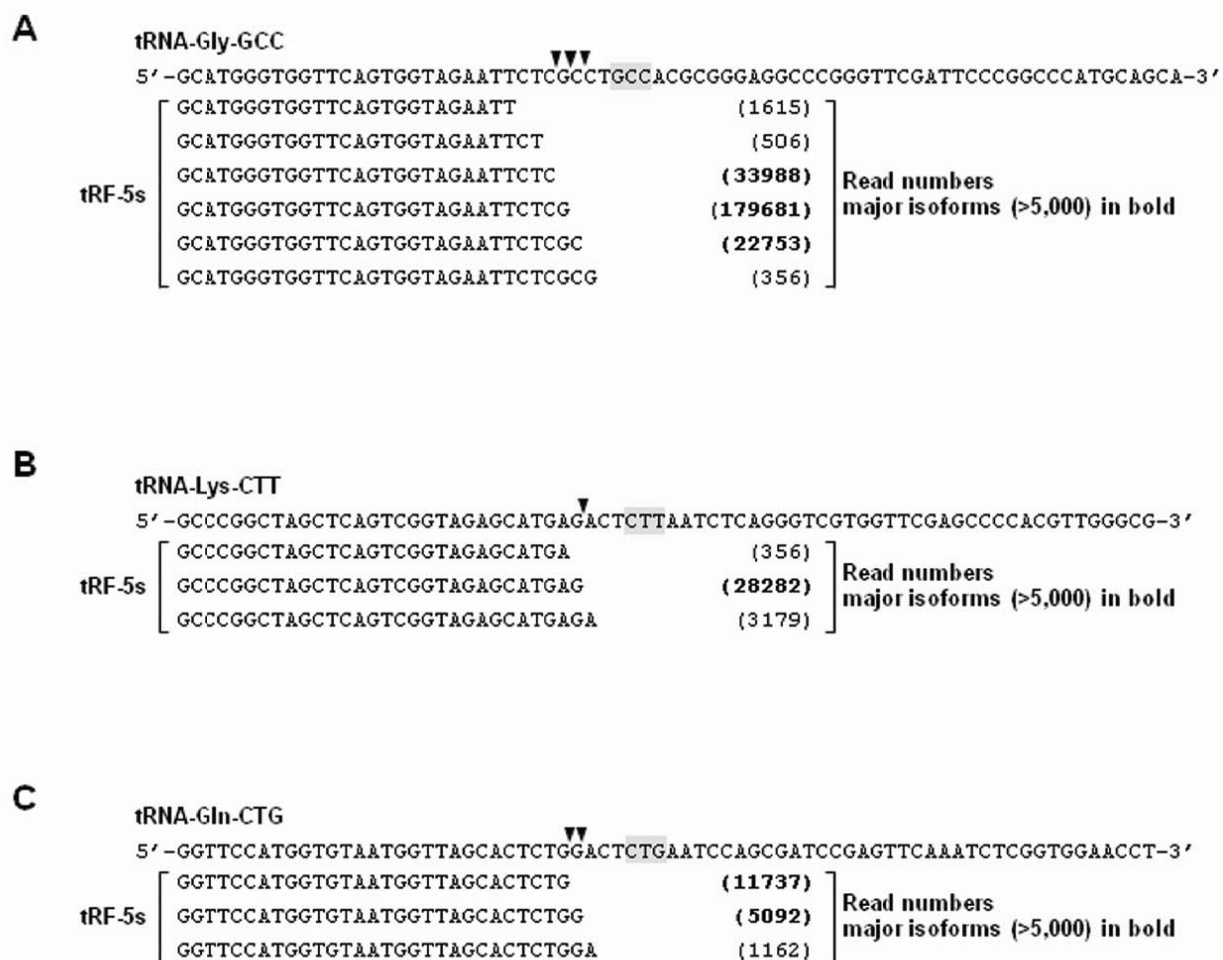

Supplement: mt2012237x6.pdf [file mt2012237x6.pdf]

Figure S7

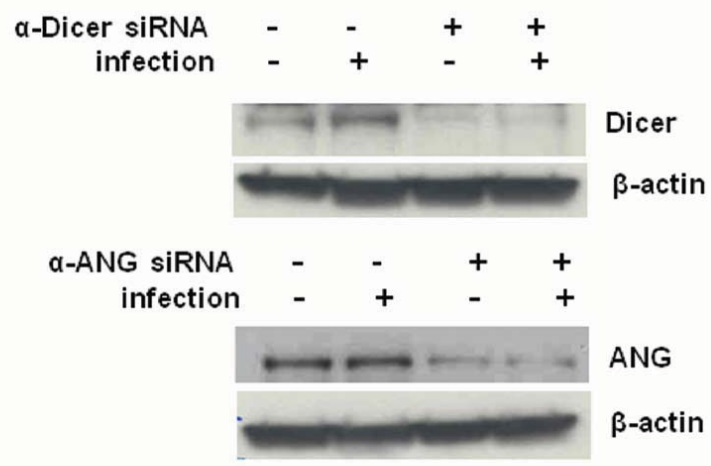

Supplement: mt2012237x7.pdf [file mt2012237x7.pdf]
